# Supplementary material for: Role of (3-aminopropyl)tri alkoxysilanes in grafting of chlorosulphonic acid immobilized magnetic nanoparticles and their application as heterogeneous catalysts for the green synthesis of α-aminonitriles
Source: Royal Society of Chemistry journal article supplement (doi:10.1039/c6ra20095h), 2016-01-01
Supplement: c6ra20095h1.pdf [file c6ra20095h1.pdf]

**Table A. List of Abbreviations**

|                                                                              |                                                                                                             |
|------------------------------------------------------------------------------|-------------------------------------------------------------------------------------------------------------|
| <b>Fe<sub>3</sub>O<sub>4</sub></b>                                           | Iron oxide magnetic nanoparticles                                                                           |
| <b>SiO<sub>2</sub></b>                                                       | Silicon oxide                                                                                               |
| <b>Fe<sub>3</sub>O<sub>4</sub>@SiO<sub>2</sub></b>                           | Iron oxide coated with Silica                                                                               |
| <b>Fe<sub>3</sub>O<sub>4</sub>@SiO<sub>2</sub>-Pr-NH<sub>2</sub>(APTMS)</b>  | Amine (3-Aminopropyltrimethoxy Silane) coated silica magnetic nanoparticles                                 |
| <b>Fe<sub>3</sub>O<sub>4</sub>@SiO<sub>2</sub>-Pr-NH<sub>2</sub>(APTES)</b>  | Amine (3-Aminopropyltriethoxy Silane) coated silica magnetic nanoparticles                                  |
| <b>Fe<sub>3</sub>O<sub>4</sub>@SiO<sub>2</sub>-Pr-NH-SO<sub>3</sub>H(AM)</b> | Chlorosulphonic acid coating on amine (3-Aminopropyltrimethoxy Silane) coated silica magnetic nanoparticles |
| <b>Fe<sub>3</sub>O<sub>4</sub>@SiO<sub>2</sub>-Pr-NH-SO<sub>3</sub>H(AE)</b> | Chlorosulphonic acid coating on amine (3-Aminopropyltriethoxy Silane) coated silica magnetic nanoparticles  |
| <b>MNPs</b>                                                                  | Magnetic nanoparticles                                                                                      |
| <b>TMSCN</b>                                                                 | Trimethylsilyl cyanide                                                                                      |
| <b>TEOS</b>                                                                  | Tetraethylorthosilicate                                                                                     |
| <b>CDCl<sub>3</sub></b>                                                      | Deuterated chloroform                                                                                       |
| <b>Fe<sub>2</sub>(SO<sub>4</sub>)<sub>3</sub></b>                            | Iron(III) sulfate                                                                                           |
| <b>FeSO<sub>4</sub></b>                                                      | Iron(II) sulfate                                                                                            |
| <b>NH<sub>4</sub>OH</b>                                                      | Ammonium hydroxide                                                                                          |
| <b>DCM</b>                                                                   | Dichloromethane                                                                                             |
| <b>BaCl<sub>2</sub></b>                                                      | Barium dichloride                                                                                           |
| <b>NaHCO<sub>3</sub></b>                                                     | Sodium bicarbonate                                                                                          |
| <b>FT-IR</b>                                                                 | Fourier transform infrared spectroscopy                                                                     |
| <b>XRD</b>                                                                   | X-ray diffraction                                                                                           |
| <b>VSM</b>                                                                   | Vibrating sample magnetometer                                                                               |
| <b>TEM</b>                                                                   | Transmission electron microscopy                                                                            |
| <b>TGA</b>                                                                   | Thermogravimetric analysis                                                                                  |
| <b>BET</b>                                                                   | Brunauer–Emmett–Teller                                                                                      |
| <b>XPS</b>                                                                   | X-ray photoelectron spectroscopy                                                                            |
| <b>NMR</b>                                                                   | Nuclear magnetic resonance spectroscopy                                                                     |
| <b>TLC</b>                                                                   | <i>Thin-layer chromatography</i>                                                                            |
| <b>MHz</b>                                                                   | Megahertz                                                                                                   |
| <b>Ms</b>                                                                    | Saturation magnetization                                                                                    |
| <b>ppm</b>                                                                   | <i>Parts per million</i>                                                                                    |

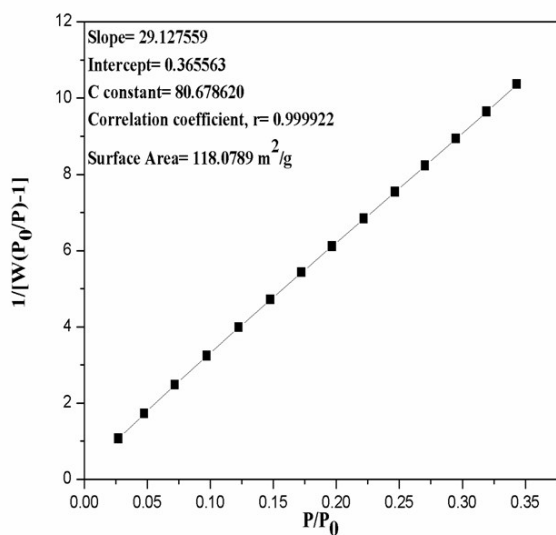

(a)

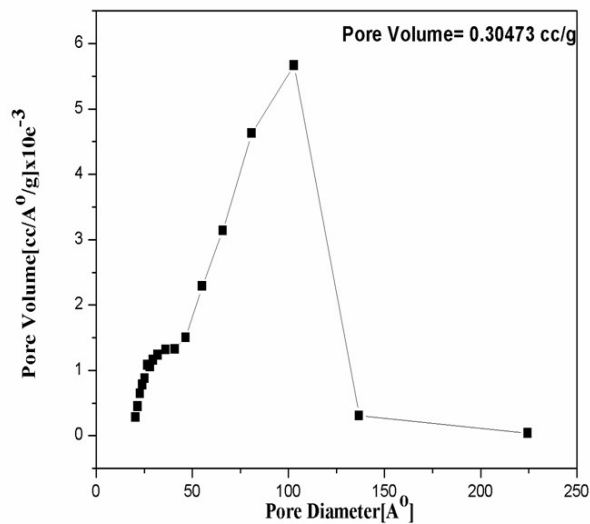

(b)

Fig. 1 (a) Surface area plot of Fe<sub>3</sub>O<sub>4</sub> (b) Pore volume plot of Fe<sub>3</sub>O<sub>4</sub>

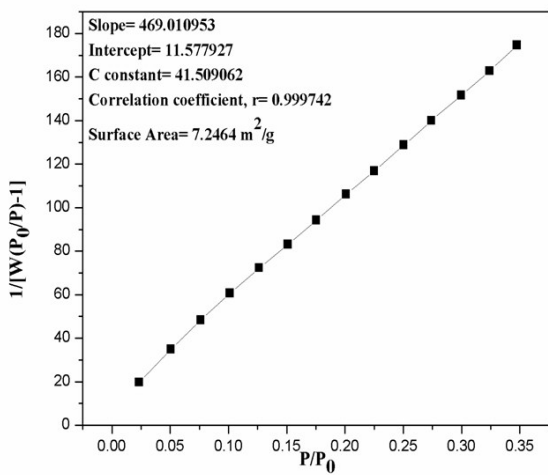

(a)

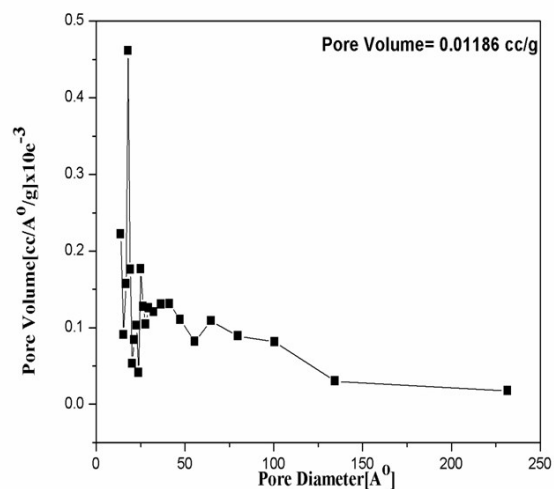

(b)

Fig. 2 (a) Surface area plot of Fe<sub>3</sub>O<sub>4</sub>@SiO<sub>2</sub> (b) Pore volume plot of Fe<sub>3</sub>O<sub>4</sub>@SiO<sub>2</sub>

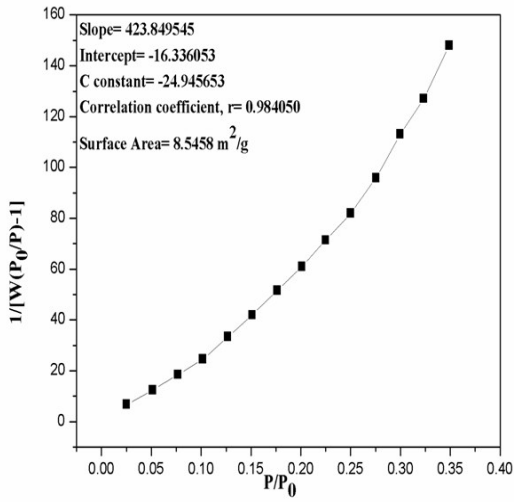

(a)

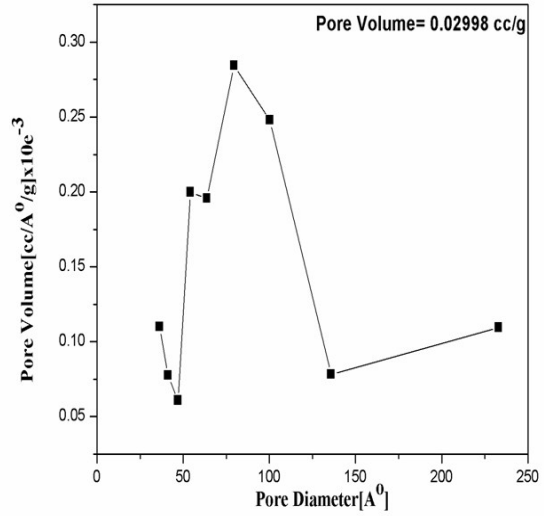

(b)

Fig. 3 (a) Surface area plot of  $\text{Fe}_3\text{O}_4@\text{SiO}_2-\text{Pr}-\text{NH}_2(\text{APTMS})$ (b) Pore volume plot of  $\text{Fe}_3\text{O}_4@\text{SiO}_2-\text{Pr}-\text{NH}_2(\text{APTMS})$

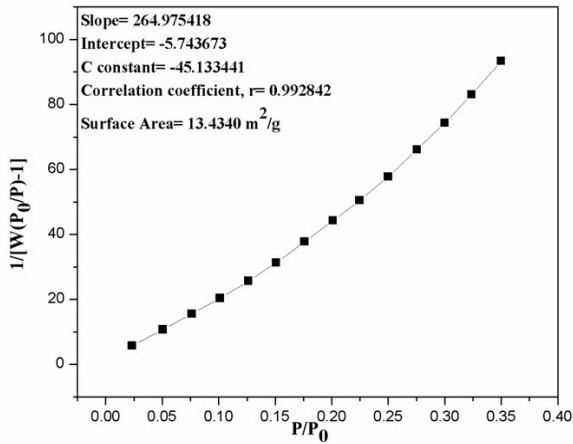

(a)

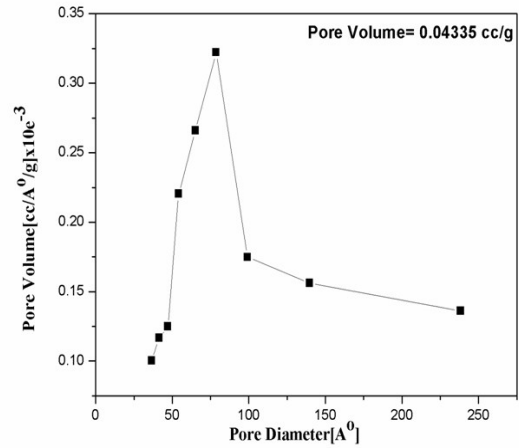

(b)

Fig. 3 (a) Surface area plot of  $\text{Fe}_3\text{O}_4@\text{SiO}_2-\text{Pr}-\text{NH}_2(\text{APTMS})$ (b) Pore volume plot of  $\text{Fe}_3\text{O}_4@\text{SiO}_2-\text{Pr}-\text{NH}_2(\text{APTMS})$
